# Supplementary material for: CT quantification of pneumonia lesions in early days predicts progression to severe illness in a cohort of COVID-19 patients
Source: PubMed Central journal article supplement (PMC7196293; doi:10.7150/thno.45985), 2020-04-27
Supplement: thnov10p5613s1.pdf [file thnov10p5613s1.pdf]

## Supplemental Figures and Tables

**Table S1.** Comparisons of clinical biomarkers and quantitative CT features for the patients who progressed to severe illness (severe group) versus those who did not progress to severe illness (non-severe group).

|                            | Day 0            |                       |          | Day 4            |                       |          | Changes from Day 0 to Day 4 |                       |          |
|----------------------------|------------------|-----------------------|----------|------------------|-----------------------|----------|-----------------------------|-----------------------|----------|
|                            | Severe<br>(n=19) | Non-severe<br>(n=115) | <i>P</i> | Severe<br>(n=18) | Non-severe<br>(n=115) | <i>P</i> | Severe<br>(n=18)            | Non-severe<br>(n=115) | <i>P</i> |
| <b>Clinical biomarkers</b> |                  |                       |          |                  |                       |          |                             |                       |          |
| APACHE-II                  | 9.0(4.0~11.0)    | 8.0(5.0~11.0)         | 0.518    | 11.5(7.5~13.8)   | 8.0(4.0~11.0)         | 0.019    | 5.0(0.2~8.5)                | 0.0(-1.5~2.0)         | 0.003    |
| NLR                        | 3.4(2.8~5.8)     | 2.7(1.8~3.7)          | 0.010    | 5.0(2.4~9.7)     | 1.9(1.5~2.6)          | <0.001   | 1.2(-0.9~3.0)               | -0.4(-1.5~0.2)        | 0.005    |
| D-dimer                    | 0.5(0.3~0.9)     | 0.3(0.2~0.5)          | 0.011    | 0.8(0.4~1.0)     | 0.4(0.3~0.6)          | 0.003    | 0.2(0.0~0.3)                | 0.0(-0.0~0.1)         | 0.045    |
| <b>CT features</b>         |                  |                       |          |                  |                       |          |                             |                       |          |
| PGV, %                     | 2.2(0.9~4.2)     | 0.8(0.2~2.1)          | 0.009    | 5.5(4.8~8.8)     | 1.5(0.7~2.8)          | <0.001   | 3.7(1.4~5.0)                | 0.4(0.0~1.3)          | <0.001   |
| PSV, %                     | 2.4(0.7~4.6)     | 0.7(0.1~2.1)          | 0.005    | 11.4(5.9~16.3)   | 1.2(0.6~2.9)          | <0.001   | 5.5(3.8~10.9)               | 0.3(0.0~1.2)          | <0.001   |
| PCV, %                     | 1.1(0.2~2.2)     | 0.3(0.0~1.0)          | 0.009    | 5.8(2.3~11.3)    | 0.7(0.2~1.5)          | <0.001   | 4.0(1.8~7.5)                | 0.2(0.0~0.7)          | <0.001   |

Note:

(a) All variables are expressed as median (interquartile range). GGO, ground glass opacity.

(b) PGV=Percentage of GGO volume; PSV=Percentage of semiconsolidation volume; PCV=Percentage of consolidation volume

(c) One patient had severe events on the same day when performing the second CT, and thus he was removed from the analysis with day 4 and changes from day 0 to day 4.

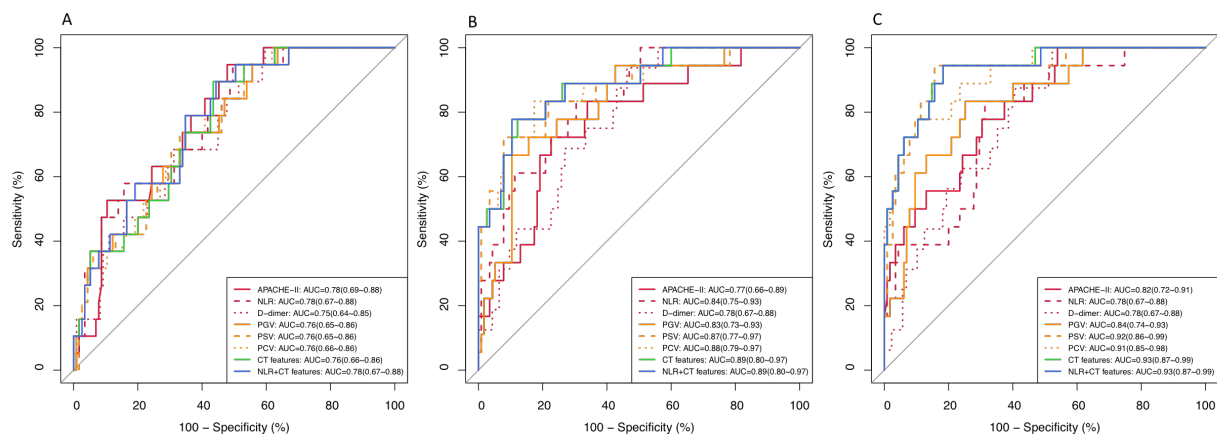

**Figure S1.** Receiver operating characteristic (ROC) curves for predicting occurrence of severe illness with logistic regression analysis. A: on day 0. B: on day 4. C: in terms of changes from day 0 to day 4.

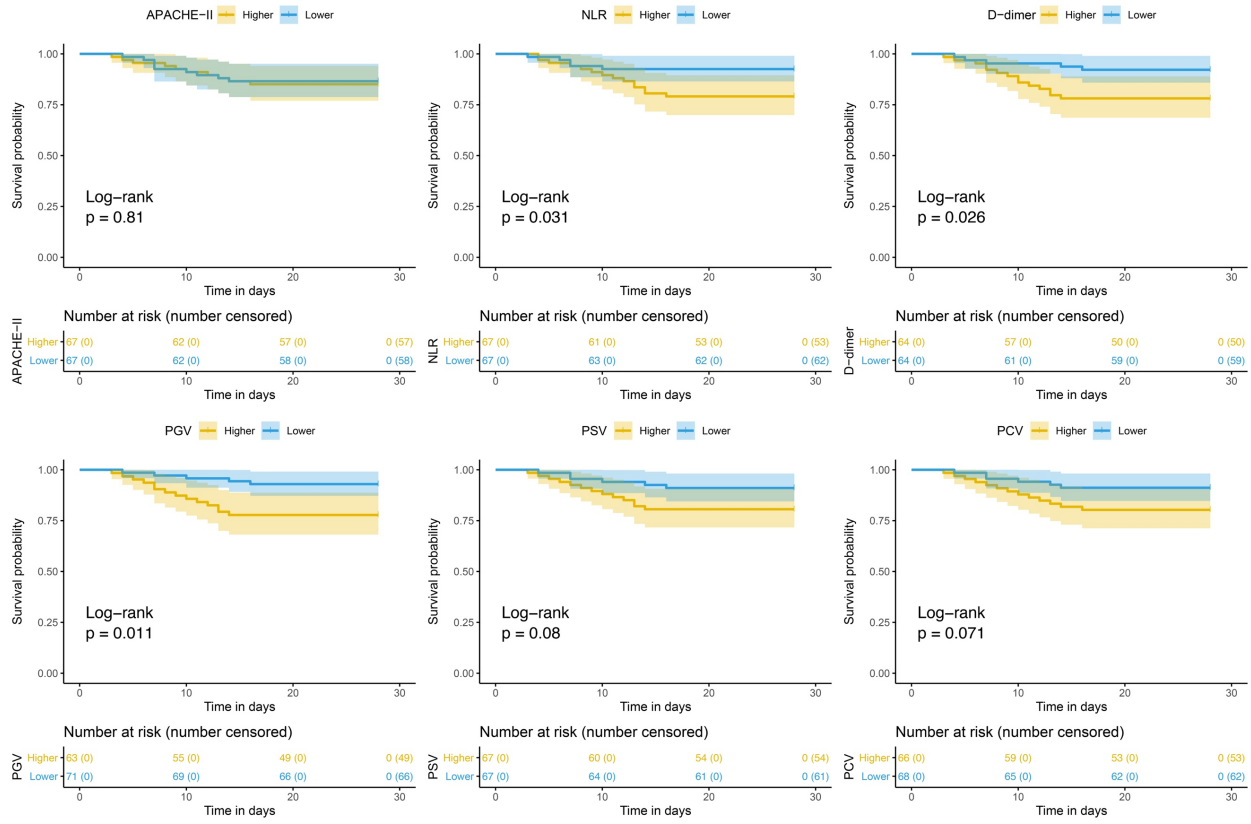

**Figure S2** Kaplan-Meier survival analysis of the relationships between each of NLR, APACHE II, and quantitative CT features and severe-event-free survival on day 0. Each feature was stratified by the median to perform Kaplan-Meier analysis.

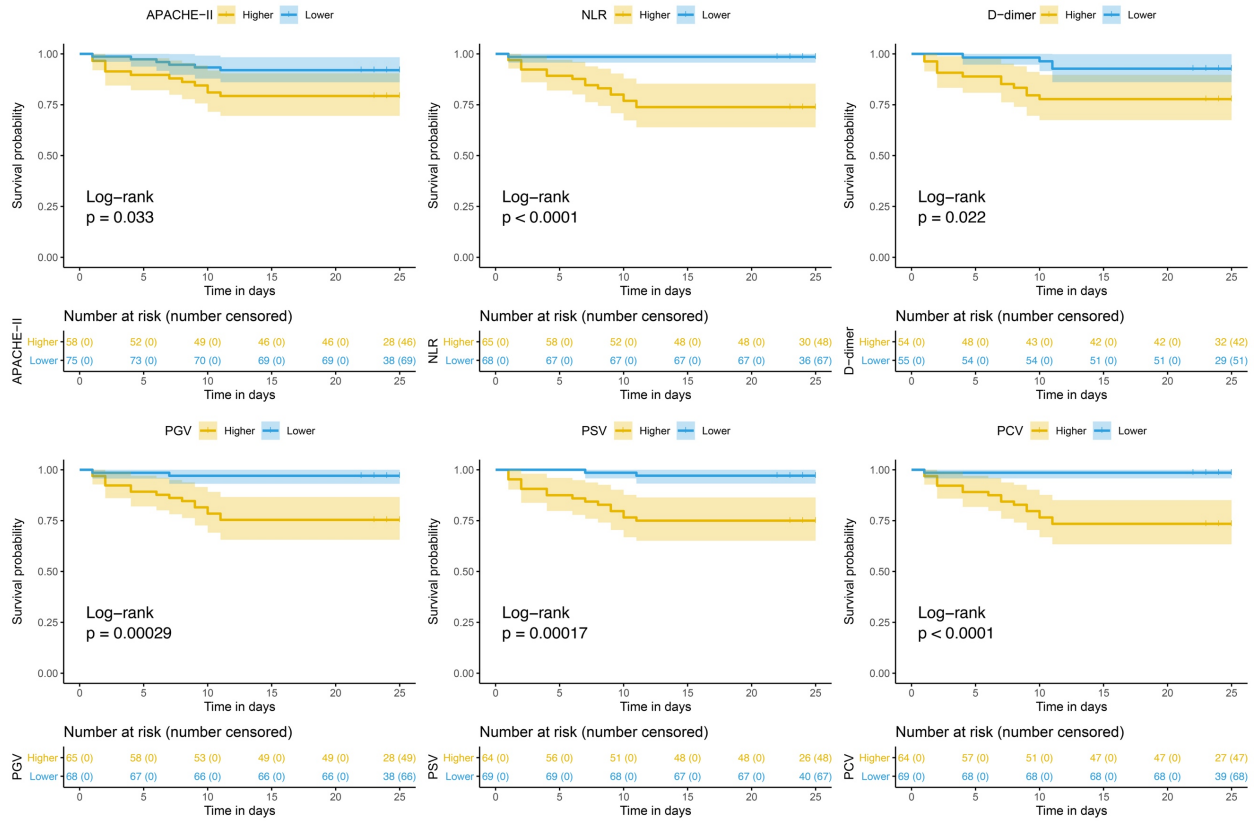

**Figure S3.** Kaplan-Meier survival analysis of the relationships between each of NLR, APACHE II, and quantitative CT features and severe-event-free survival on day 4. Each feature was stratified by the median to perform Kaplan-Meier analysis.

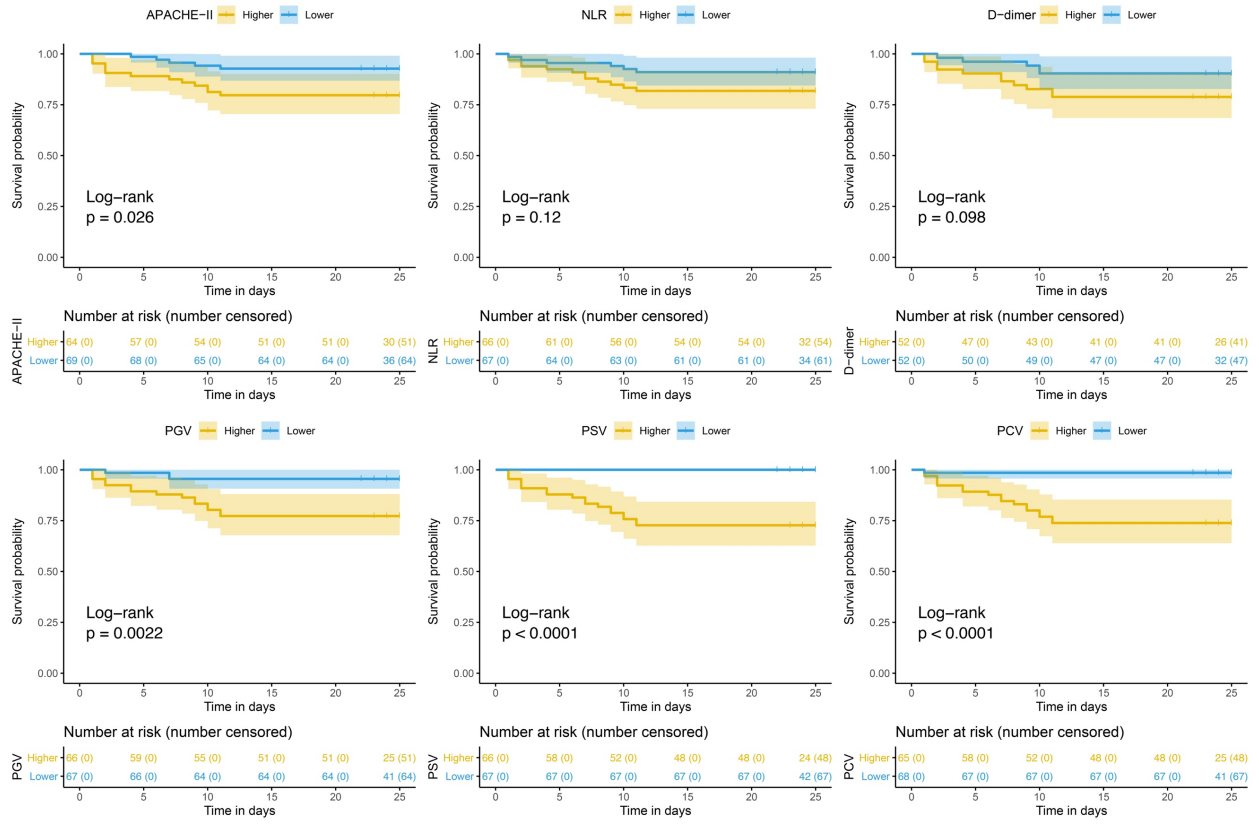

**Figure S4.** Kaplan-Meier survival analysis of the relationships between each of NLR, APACHE II, and quantitative CT features and severe-event-free survival in terms of changes from day 0 to day 4. Each feature was stratified by the median to perform Kaplan-Meier analysis.

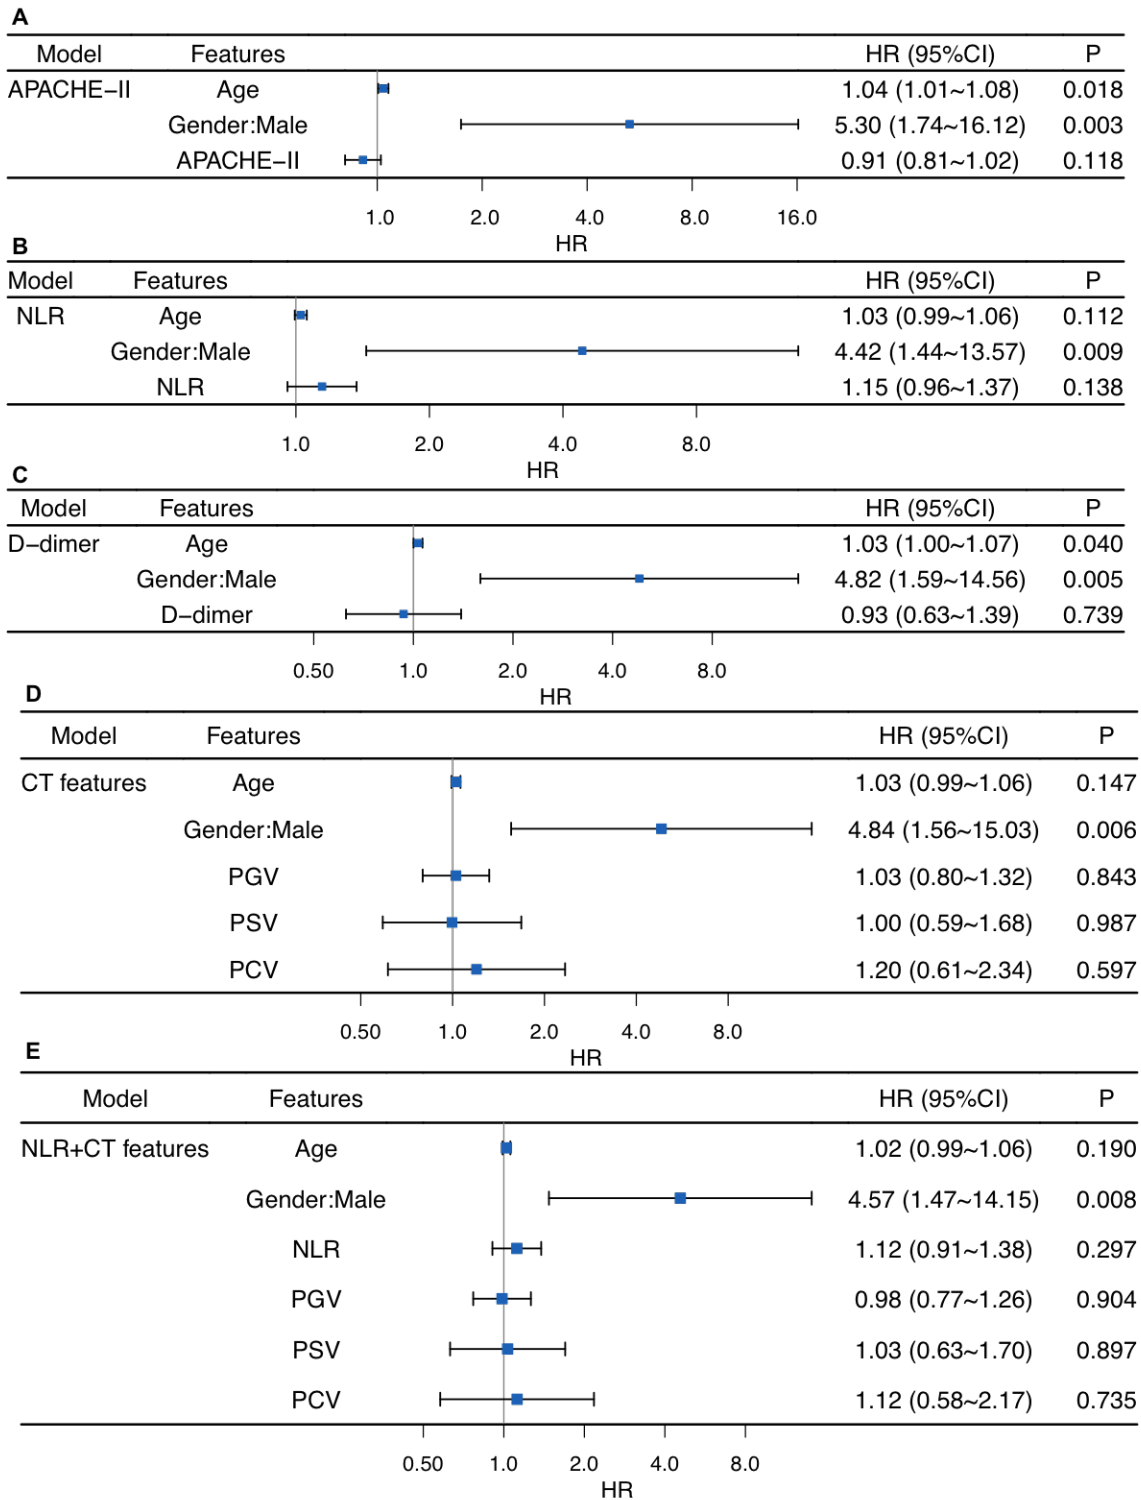

**Figure S5.** Relationship between each feature on day 0 and severe-event-free survival on the multivariate Cox analyses. All models were adjusted for traditional clinical variables including age and gender.

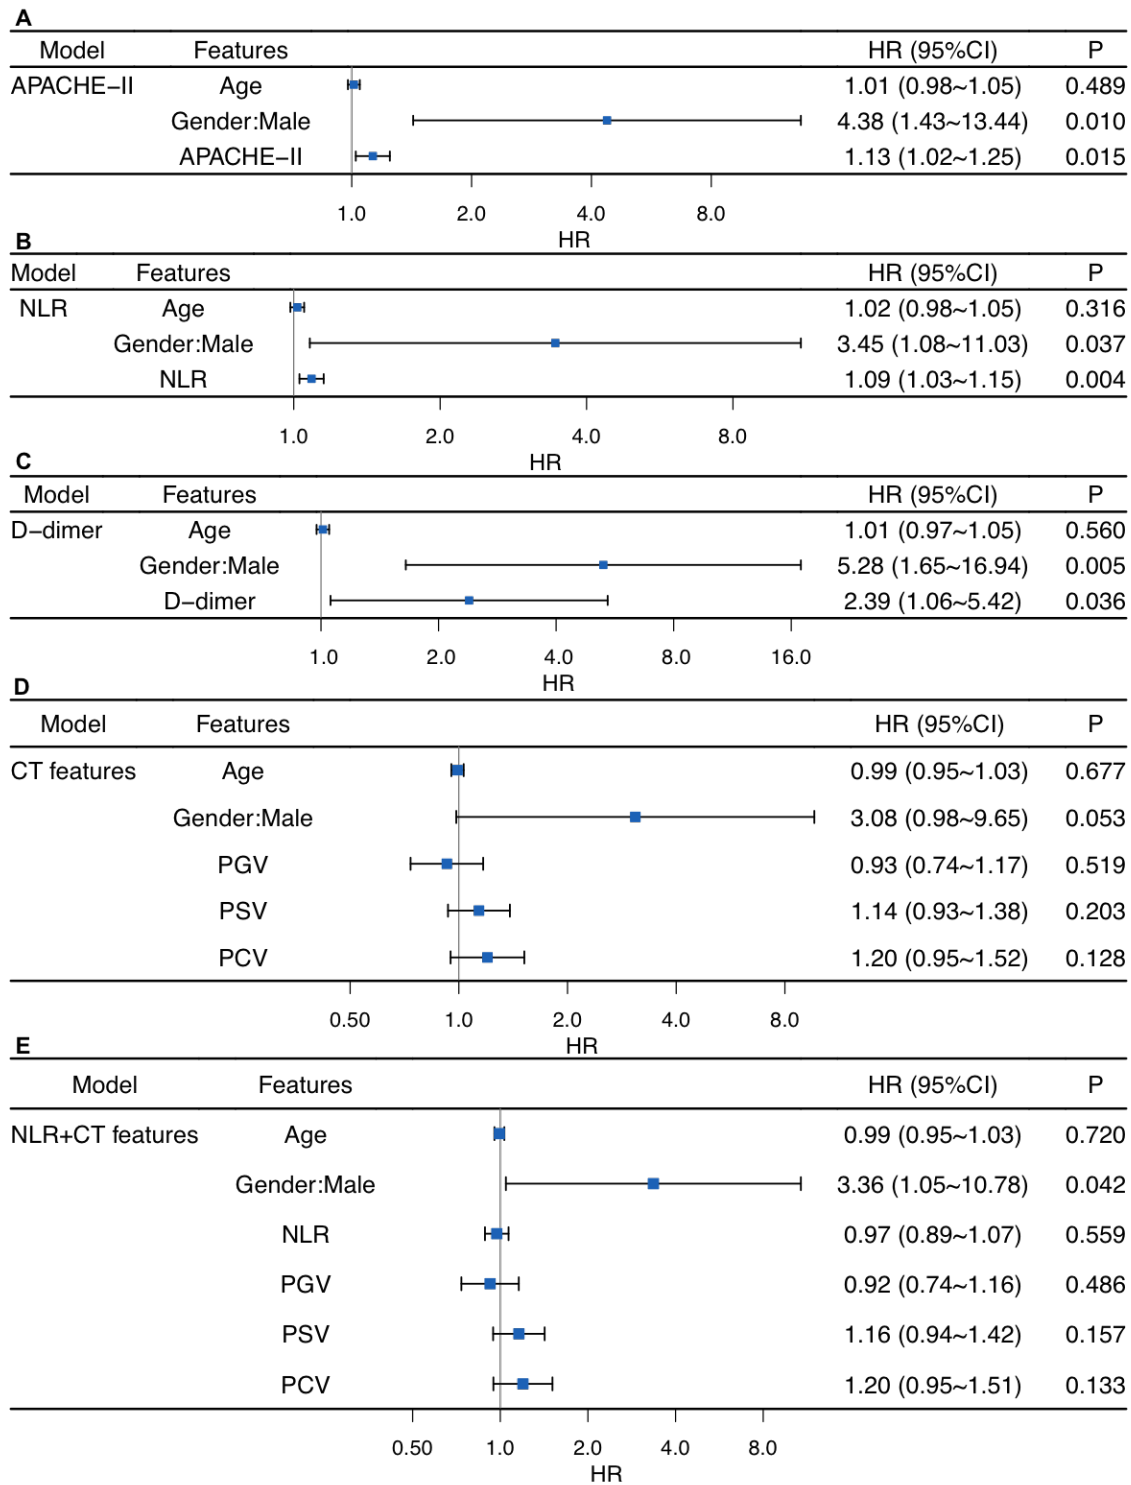

**Figure S6.** Relationship between each feature on day 4 and severe-event-free survival on the multivariate Cox analyses. All models were adjusted for traditional clinical variables including age and gender.

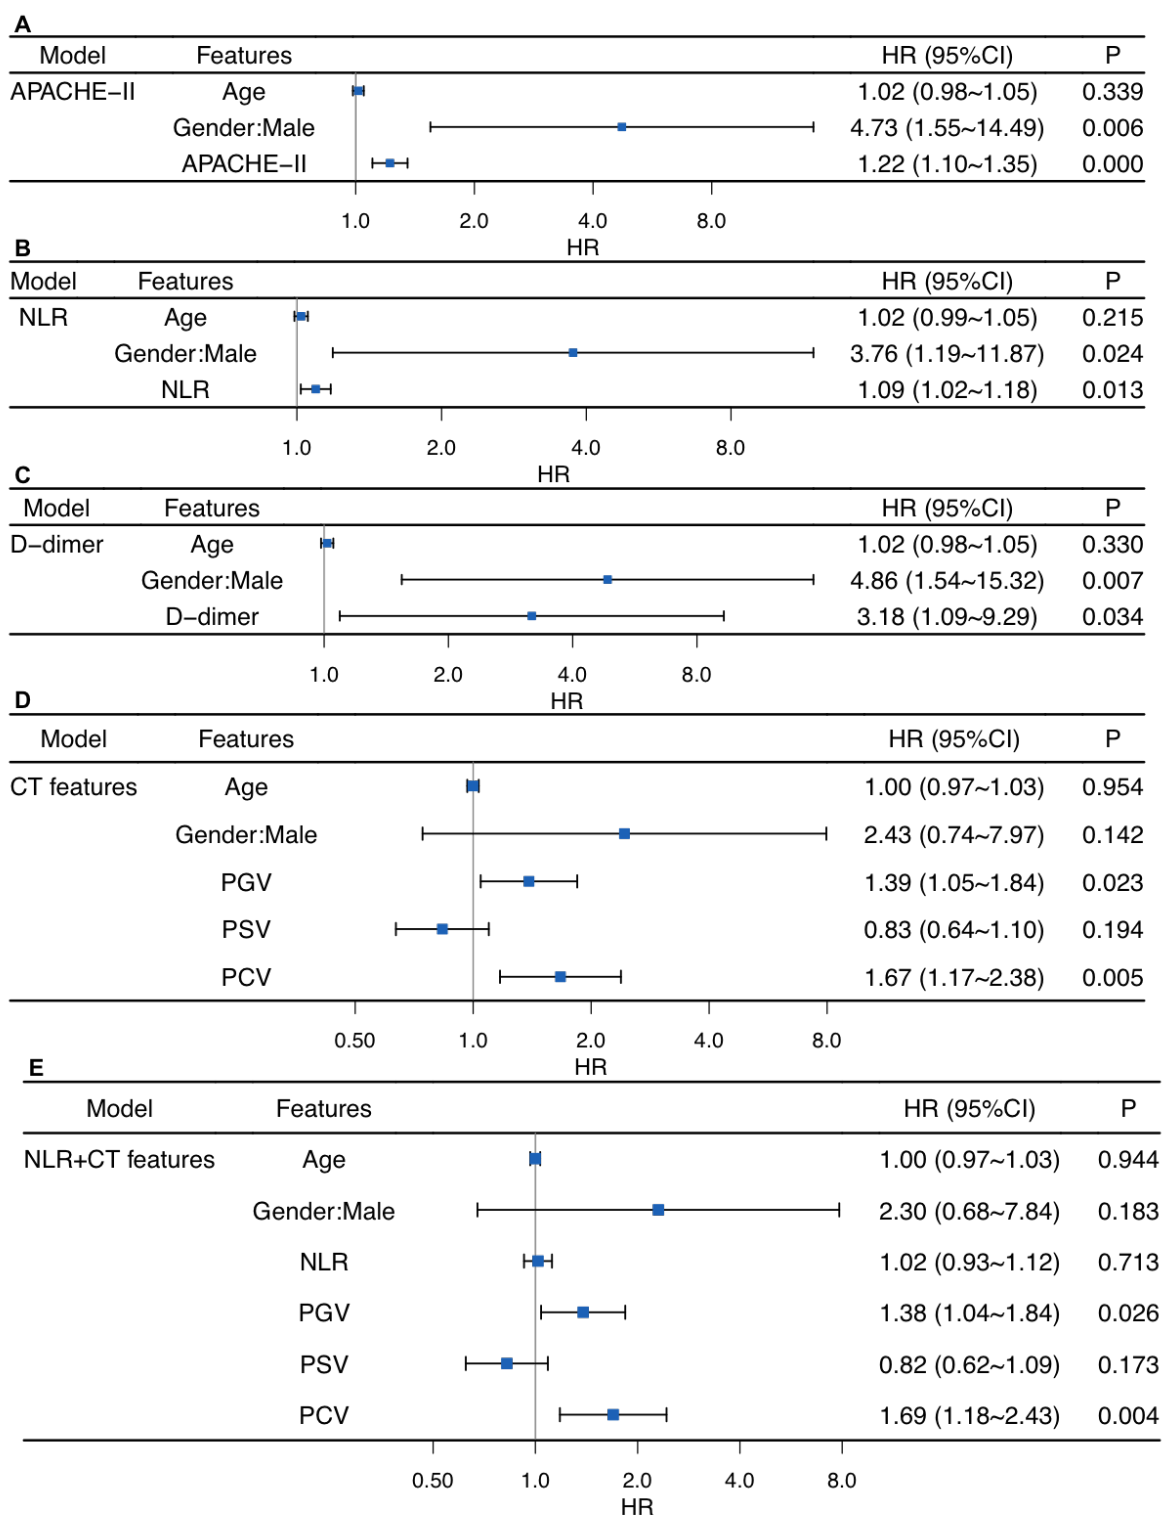

**Figure S7.** Relationship between changes in each feature from day 0 to day 4 and severe-event-free survival on the multivariate Cox analyses. All models were adjusted for traditional clinical variables including age and gender.
